# Supplementary material for: Chemical Source Profiles and Toxicity Assessment of Urban Fugitive Dust PM2.5 in Guanzhong Plain, China
Source: MDPI journal article supplement (doi:10.3390/toxics11080676), 2023-08-07
Supplement: s1 [file s1]

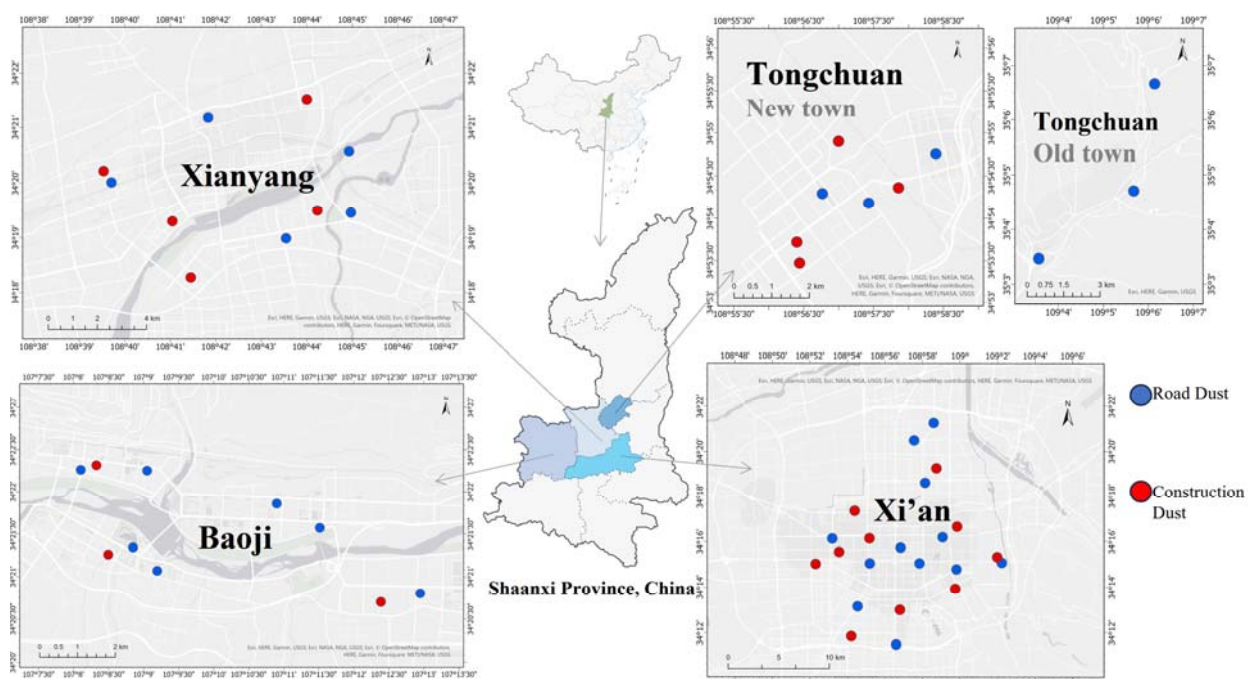

Figure S1. The specific loaction of sampling sites.

**Table S1.** Values of parameters for health risk calculation.

| Indicators       | Parameters | Defination                           | Units               | Adult                | Children             | Reference  |
|------------------|------------|--------------------------------------|---------------------|----------------------|----------------------|------------|
| Exposure factors | EF         | Exposure frequency                   | day/year            | 350                  | 350                  | [1]        |
|                  | ED         | Exposure duration                    | year                | 24                   | 6                    | [1]        |
|                  | BW         | Body weight                          | kg                  | 70                   | 15                   | [2]        |
|                  | AT         | Average exposed time(non-carcinogen) | day                 | ED×365               | ED×365               | [1]        |
|                  |            | Average exposed time(carcinogen)     | day                 | 70×365               | 70×365               | [1]        |
|                  | CF         | Conversion factor                    | -                   | 10 <sup>-6</sup>     | 10 <sup>-6</sup>     |            |
| Ingestion        | C          | Concentration of heavy metals        | mg/kg               | -                    | -                    | this study |
|                  | ingR       | Ingestion rate of dust               | mg/day              | 100                  | 200                  | [1]        |
| Inhalation       | inhR       | Inhalation rate of dust              | m <sup>3</sup> /day | 20                   | 7.6                  | [3]        |
| Dermal contact   | PEF        | Particle emission factor             | m <sup>3</sup> /kg  | 1.36×10 <sup>9</sup> | 1.36×10 <sup>9</sup> | [1]        |
|                  | SL         | Skin adherence fatcor                | mg/cm <sup>2</sup>  | 0.07                 | 0.2                  | [1]        |
|                  | SA         | Exposed skin area                    | cm <sup>2</sup>     | 5700                 | 2800                 | [1]        |
|                  | ABS        | Dermal absorption factor (except As) | -                   | 0.001                | 0.001                | [1]        |
|                  |            | Dermal absorption factor (for As)    | -                   | 0.03                 | 0.03                 | [1]        |

**Table S2.** Summary of reference doses (RfD) and slope factors (SF) of heavy metals.

|                                   | Mn       | Co       | Ni       | Cu       | As       | Pb       | Zn       |
|-----------------------------------|----------|----------|----------|----------|----------|----------|----------|
| RfD <sub>ing</sub> (mg/kg/day)    | 4.60E-02 | 2.00E-02 | 2.00E-02 | 4.00E-02 | 3.00E-04 | 3.50E-03 | 3.00E-01 |
| RfD <sub>inh</sub> (mg/kg/day)    | 1.43E-05 | 5.71E-06 | 2.06E-02 | 4.02E-02 | 3.01E-04 | 3.52E-03 | 3.00E-01 |
| RfD <sub>dermal</sub> (mg/kg/day) | 1.84E-03 | 1.60E-02 | 5.40E-03 | 1.20E-02 | 1.23E-04 | 5.25E-04 | 6.00E-02 |
| Sf <sub>inh</sub> (mg/kg/day)     |          | 6.30E-01 | 8.40E-01 |          | 1.51E+01 | 4.20E-02 |          |

Reference: [4,5]

**Table S3.** List of major variables for LUR model.

| Factors          | Independent variables            | Descriptions                                             | buffer radii | unit  |
|------------------|----------------------------------|----------------------------------------------------------|--------------|-------|
| Traffic related  | Transport Station (TransStation) | number of bus stops, metro stations and train stations   |              | count |
|                  | automobile related (AutoRelated) | number of dealerships, garages, and gas stations         |              | count |
|                  | first-class road (1stRaod)       | length of road                                           | 100m         | km    |
|                  | second-class road (2ndRaod)      | length of road                                           | 300m         | km    |
|                  | third-class road (3rdRaod)       | length of road                                           | 500m         | km    |
| Domestic related | Restaruant                       | number of restaurants                                    | 1000m        | count |
|                  | Hotel                            | number of hotels                                         | 1500m        | count |
|                  | Residence                        | number of residential buildings                          | 2000m        | count |
|                  | LifeService                      | number of express points, barber shops, toilet and so on |              | count |
| Other            | Enterprise                       | number of enterprises and companies                      |              | count |

**Table S4a.** Element concentration of road dust PM<sub>2.5</sub> in four selected cities.

|       | XA              |       | XY              |       | BJ              |       | TCH             |      |
|-------|-----------------|-------|-----------------|-------|-----------------|-------|-----------------|------|
|       | Concentration,  |       | Concentration,  |       | Concentration,  |       | Concentration,  |      |
|       | $\mu\text{g/g}$ |       | $\mu\text{g/g}$ |       | $\mu\text{g/g}$ |       | $\mu\text{g/g}$ |      |
|       | MEAN            | SD    | MEAN            | SD    | MEAN            | SD    | MEAN            | SD   |
| K     | 45132           | 12828 | 33069           | 6762  | 35151           | 5340  | 26976           | 2170 |
| Ca    | 339562          | 91921 | 262562          | 34604 | 262806          | 50716 | 225891          | 8967 |
| Fe    | 49705           | 8092  | 45797           | 6733  | 51502           | 5746  | 37885           | 2414 |
| Mn    | 1457            | 390   | 1127            | 229   | 1195            | 143   | 837             | 60   |
| Ti    | 3983            | 792   | 3913            | 432   | 3938            | 335   | 4336            | 1295 |
| V     | 110             | 46    | 90              | 23    | 101             | 27    | 54              | 16   |
| Sc    | 3245            | 1354  | 1958            | 409   | 2307            | 625   | 1441            | 98   |
| Co    | 490             | 277   | 292             | 101   | 416             | 159   | 167             | 34   |
| Ni    | 313             | 136   | 341             | 147   | 433             | 139   | 192             | 32   |
| Cu    | 724             | 264   | 399             | 101   | 536             | 157   | 237             | 25   |
| As    | 83              | 38    | 57              | 19    | 80              | 33    | 54              | 19   |
| Se    | 32              | 17    | 19              | 7     | 27              | 10    | 11              | 3    |
| Br    | 55              | 35    | 21              | 5     | 48              | 28    | 21              | 5    |
| Cl    | 7181            | 3173  | 4385            | 1267  | 5462            | 1792  | 2584            | 558  |
| Sr    | 1249            | 448   | 1354            | 470   | 1117            | 388   | 661             | 74   |
| Ba    | 2007            | 841   | 938             | 372   | 1179            | 306   | 666             | 116  |
| Pb    | 743             | 342   | 466             | 134   | 599             | 151   | 311             | 71   |
| Ga    | 195             | 105   | 120             | 38    | 161             | 64    | 76              | 22   |
| Zn    | 3318            | 1310  | 1935            | 496   | 2651            | 371   | 1328            | 183  |
| Total | 437499          | 46730 | 358843          | 50216 | 369711          | 64231 | 303730          | 9850 |

**Table S4b.** Element concentration of construction dust PM<sub>2.5</sub> in four selected cities.

|       | XA              |       | XY              |       | BJ              |       | TCH             |       |
|-------|-----------------|-------|-----------------|-------|-----------------|-------|-----------------|-------|
|       | Concentration,  |       | Concentration,  |       | Concentration,  |       | Concentration,  |       |
|       | $\mu\text{g/g}$ |       | $\mu\text{g/g}$ |       | $\mu\text{g/g}$ |       | $\mu\text{g/g}$ |       |
|       | MEAN            | SD    | MEAN            | SD    | MEAN            | SD    | MEAN            | SD    |
| K     | 32364           | 8691  | 34613           | 6046  | 21856           | 4981  | 32512           | 3897  |
| Ca    | 228523          | 40349 | 263556          | 41106 | 232551          | 11358 | 240964          | 17035 |
| Fe    | 47721           | 10234 | 50996           | 6811  | 37719           | 12696 | 42039           | 6828  |
| Mn    | 1213            | 273   | 1276            | 180   | 909             | 183   | 1029            | 110   |
| Ti    | 3481            | 777   | 3304            | 551   | 2729            | 396   | 3375            | 459   |
| V     | 80              | 34    | 83              | 13    | 63              | 12    | 73              | 22    |
| Sc    | 1647            | 529   | 2164            | 430   | 1176            | 322   | 1491            | 295   |
| Co    | 236             | 124   | 250             | 60    | 117             | 59    | 186             | 61    |
| Ni    | 222             | 98    | 198             | 30    | 130             | 32    | 194             | 66    |
| Cu    | 282             | 106   | 317             | 71    | 170             | 20    | 196             | 52    |
| As    | 65              | 21    | 68              | 14    | 40              | 5     | 69              | 23    |
| Se    | 15              | 9     | 17              | 4     | 8               | 3     | 12              | 4     |
| Br    | 27              | 19    | 29              | 9     | 14              | 8     | 19              | 12    |
| Cl    | 3815            | 1795  | 3885            | 832   | 1766            | 512   | 2540            | 792   |
| Sr    | 848             | 273   | 1000            | 127   | 650             | 90    | 862             | 271   |
| Ba    | 950             | 522   | 826             | 230   | 495             | 162   | 671             | 327   |
| Pb    | 355             | 119   | 352             | 116   | 204             | 36    | 216             | 35    |
| Ga    | 102             | 43    | 106             | 17    | 56              | 18    | 79              | 14    |
| Zn    | 1572            | 679   | 1438            | 268   | 721             | 130   | 1015            | 157   |
| Total | 323517          | 46730 | 364477          | 49025 | 301375          | 9954  | 327540          | 22600 |

**Table S5a.** Water-soluble ions of road dust PM<sub>2.5</sub> in four selected cities.

|                               | XA             |       | XY             |       | BJ             |       | TCH            |       |
|-------------------------------|----------------|-------|----------------|-------|----------------|-------|----------------|-------|
|                               | Concentration, |       | Concentration, |       | Concentration, |       | Concentration, |       |
|                               | <u>µg/g</u>    |       | <u>µg/g</u>    |       | <u>µg/g</u>    |       | <u>µg/g</u>    |       |
|                               | MEAN           | SD    | MEAN           | SD    | MEAN           | SD    | MEAN           | SD    |
| F <sup>-</sup>                | 16800          | 9188  | 9953           | 3292  | 9545           | 3193  | 5003           | 539   |
| Cl <sup>-</sup>               | 19667          | 9799  | 12604          | 4031  | 15147          | 5890  | 6119           | 1387  |
| NO <sub>3</sub> <sup>-</sup>  | 6901           | 4020  | 2944           | 1269  | 480            | 146   | 2268           | 863   |
| SO <sub>4</sub> <sup>2-</sup> | 39025          | 17480 | 19065          | 5428  | 17517          | 6201  | 10955          | 3179  |
| Na <sup>+</sup>               | 48226          | 22754 | 54980          | 22391 | 44159          | 23686 | 19614          | 4170  |
| NH <sub>4</sub> <sup>+</sup>  | 2563           | 2250  | 3809           | 2139  | 3261           | 2064  | 2951           | 2172  |
| K <sup>+</sup>                | 4161           | 1557  | 1865           | 392   | 2388           | 1225  | 2523           | 591   |
| Mg <sup>2+</sup>              | 10625          | 3925  | 12036          | 4921  | 11993          | 4381  | 5318           | 397   |
| Ca <sup>2+</sup>              | 156775         | 36490 | 197482         | 32254 | 158356         | 50294 | 133626         | 29401 |
| Total                         | 285334         | 78046 | 312979         | 70592 | 257481         | 86247 | 186560         | 29670 |

**Table S5b.** Water-soluble ions of construction dust PM<sub>2.5</sub> in four selected cities.

|                               | XA             |       | XY             |       | BJ             |       | TCH            |       |
|-------------------------------|----------------|-------|----------------|-------|----------------|-------|----------------|-------|
|                               | Concentration, |       | Concentration, |       | Concentration, |       | Concentration, |       |
|                               | <u>µg/g</u>    |       | <u>µg/g</u>    |       | <u>µg/g</u>    |       | <u>µg/g</u>    |       |
|                               | MEAN           | SD    | MEAN           | SD    | MEAN           | SD    | MEAN           | SD    |
| F <sup>-</sup>                | 9953           | 3292  | 12343          | 8533  | 3783           | 1340  | 6282           | 1920  |
| Cl <sup>-</sup>               | 12604          | 4031  | 14393          | 10645 | 3530           | 1569  | 7235           | 2419  |
| NO <sub>3</sub> <sup>-</sup>  | 2944           | 1269  | 6063           | 6307  | 1648           | 499   | 4255           | 1339  |
| SO <sub>4</sub> <sup>2-</sup> | 19065          | 5428  | 27213          | 18688 | 9859           | 1771  | 10744          | 3904  |
| Na <sup>+</sup>               | 54980          | 22391 | 34461          | 12739 | 10529          | 3216  | 28589          | 10130 |
| NH <sub>4</sub> <sup>+</sup>  | 3809           | 2139  | 1900           | 824   | 1637           | 1221  | 2848           | 2310  |
| K <sup>+</sup>                | 1865           | 392   | 3164           | 747   | 3156           | 1233  | 5048           | 2986  |
| Mg <sup>2+</sup>              | 12036          | 4921  | 10236          | 4611  | 3254           | 1259  | 8682           | 1125  |
| Ca <sup>2+</sup>              | 197482         | 32254 | 176612         | 41472 | 115077         | 34678 | 176266         | 12744 |
| Total                         | 182196         | 57915 | 284412         | 98653 | 150960         | 43101 | 24983          | 10040 |

**Table S6.** Diagnostic ratio of water-soluble ions in Guanzhong Plain.

| Location           | Sample type | Sam-<br>pling<br>time | K <sup>+</sup> /K | Ca <sup>2+</sup> /Ca | NO <sub>3</sub> <sup>-</sup><br>/SO <sub>4</sub> <sup>2-</sup> | SO <sub>4</sub> <sup>2-</sup><br>/Ca <sup>2+</sup> | SO <sub>4</sub> <sup>2-</sup><br>/OC | SO <sub>4</sub> <sup>2-</sup><br>/EC | SO <sub>4</sub> <sup>2-</sup><br>/K <sup>+</sup> | As/Fe |
|--------------------|-------------|-----------------------|-------------------|----------------------|----------------------------------------------------------------|----------------------------------------------------|--------------------------------------|--------------------------------------|--------------------------------------------------|-------|
| XA                 | RD          | 2019.6-<br>2019.11    | 0.09              | 0.46                 | 0.18                                                           | 0.25                                               | 0.19                                 | 2.30                                 | 9.38                                             | 0.002 |
|                    | CD          |                       | 0.09              | 0.55                 | 0.27                                                           | 0.11                                               | 0.20                                 | 4.11                                 | 10.22                                            | 0.001 |
| XY                 | RD          |                       | 0.06              | 0.75                 | 0.15                                                           | 0.10                                               | 0.13                                 | 1.42                                 | 10.22                                            | 0.001 |
|                    | CD          |                       | 0.09              | 0.67                 | 0.22                                                           | 0.15                                               | 0.22                                 | 10.16                                | 8.60                                             | 0.001 |
| BJ                 | RD          |                       | 0.07              | 0.60                 | 0.03                                                           | 0.11                                               | 0.10                                 | 1.02                                 | 7.33                                             | 0.002 |
|                    | CD          |                       | 0.14              | 0.49                 | 0.17                                                           | 0.09                                               | 0.06                                 | 2.25                                 | 3.12                                             | 0.001 |
| TCH                | RD          |                       | 0.09              | 0.59                 | 0.21                                                           | 0.08                                               | 0.08                                 | 0.55                                 | 4.34                                             | 0.001 |
|                    | CD          |                       | 0.16              | 0.73                 | 0.40                                                           | 0.06                                               | 0.12                                 | 5.37                                 | 2.13                                             | 0.002 |
| Guanzhong<br>Plain | RD          |                       | 0.08              | 0.60                 | 0.14                                                           | 0.13                                               | 0.13                                 | 1.28                                 | 7.82                                             | 0.002 |
|                    | CD          |                       | 0.12              | 0.61                 | 0.26                                                           | 0.10                                               | 0.13                                 | 4.45                                 | 4.62                                             | 0.001 |

**Table S7a.** Carbonaceous frictions of road dust PM<sub>2.5</sub> in four selected cities.

|       | XA              |       | XY              |       | BJ              |       | TCH             |       |
|-------|-----------------|-------|-----------------|-------|-----------------|-------|-----------------|-------|
|       | Concentration,  |       | Concentration,  |       | Concentration,  |       | Concentration,  |       |
|       | $\mu\text{g/g}$ |       | $\mu\text{g/g}$ |       | $\mu\text{g/g}$ |       | $\mu\text{g/g}$ |       |
|       | MEAN            | SD    | MEAN            | SD    | MEAN            | SD    | MEAN            | SD    |
| TC    | 217791          | 72545 | 164887          | 27073 | 190454          | 18216 | 150421          | 11183 |
| OC    | 200843          | 66567 | 151478          | 24239 | 173282          | 17564 | 130344          | 11432 |
| EC    | 16948           | 7486  | 13409           | 3534  | 17172           | 4359  | 20077           | 3364  |
| OC/EC | 11.85           | 8.89  | 11.30           | 6.86  | 10.09           | 4.03  | 6.49            | 3.40  |
| OC1   | 11943           | 5617  | 6729            | 2274  | 9971            | 3284  | 4692            | 903   |
| OC2   | 30451           | 12691 | 18902           | 5679  | 25025           | 4974  | 12879           | 1901  |
| OC3   | 94176           | 38215 | 61796           | 10502 | 76835           | 10863 | 51870           | 6777  |
| OC4   | 61855           | 11682 | 62841           | 8040  | 60550           | 3051  | 59226           | 4437  |
| EC1   | 17700           | 8026  | 12505           | 3305  | 16415           | 3570  | 19627           | 3102  |
| EC2   | 1648            | 829   | 2115            | 612   | 1657            | 742   | 2081            | 446   |
| EC3   | 106             | 44    | 0               | 0     | 0               | 0     | 89              | 9     |
| OP    | 1926            | 1257  | 1211            | 657   | 901             | 686   | 1676            | 707   |

**Table S7b.** Carbonaceous frictions of construction dust PM<sub>2.5</sub> in four selected cities.

|       | XA              |       | XY              |       | BJ              |       | TCH             |      |
|-------|-----------------|-------|-----------------|-------|-----------------|-------|-----------------|------|
|       | Concentration,  |       | Concentration,  |       | Concentration,  |       | Concentration,  |      |
|       | $\mu\text{g/g}$ |       | $\mu\text{g/g}$ |       | $\mu\text{g/g}$ |       | $\mu\text{g/g}$ |      |
|       | MEAN            | SD    | MEAN            | SD    | MEAN            | SD    | MEAN            | SD   |
| TC    | 102254          | 72545 | 128133          | 32922 | 161430          | 78778 | 90170           | 6991 |
| OC    | 97619           | 66567 | 125455          | 32491 | 157043          | 77512 | 88171           | 6035 |
| EC    | 4635            | 7486  | 2678            | 2408  | 4387            | 2254  | 1999            | 1098 |
| OC/EC | 21.06           | 8.89  | 46.84           | 13.49 | 35.80           | 34.39 | 44.10           | 5.50 |
| OC1   | 5702            | 5617  | 7219            | 2800  | 6506            | 3011  | 4078            | 1370 |
| OC2   | 11802           | 12691 | 21362           | 13115 | 13027           | 6208  | 7866            | 2231 |
| OC3   | 35333           | 38215 | 46235           | 17193 | 40645           | 20623 | 25391           | 4500 |
| OC4   | 42611           | 11682 | 45129           | 6573  | 95103           | 49679 | 47306           | 2725 |
| EC1   | 4927            | 8026  | 6872            | 5591  | 3169            | 2217  | 4096            | 1056 |
| EC2   | 1845            | 829   | 1317            | 310   | 2753            | 1407  | 1433            | 299  |
| EC3   | 206             | 32    | 0               | 0     | 226             | 354   | 0               | 0    |
| OP    | 2171            | 2344  | 5510            | 6959  | 1761            | 2427  | 3530            | 671  |



**Table S8.** Detail information of each LUR model.

| Variables | Factors             | Coefficient (B) | Standardized Coefficient ( $\beta$ ) | VIF   |
|-----------|---------------------|-----------------|--------------------------------------|-------|
| HI(THM)   | constant            | 5.805           |                                      |       |
|           | TransStation (100)  | 0.497           | 0.292                                | 1.352 |
|           | TransStation (2000) | 0.002           | 0.135                                | 1.352 |
| HI(Co)    | constant            | 1.274           |                                      |       |
|           | TransStation (100)  | 0.142           | 0.234                                | 1.518 |
|           | Restaruant (300)    | 0.003           | 0.092                                | 1.683 |
|           | 1stRoad (300)       | 0.092           | 0.119                                | 1.358 |
|           | TransStation (1500) | 0.001           | 0.111                                | 1.697 |
| HI(Pb)    | constant            | 1.062           |                                      |       |
|           | TransStation (100)  | 0.128           | 0.304                                | 1.333 |
|           | LifeService (100)   | 0.018           | 0.111                                | 1.505 |
|           | 1stRoad (300)       | 0.069           | 0.128                                | 1.405 |
|           | Enterprise (1500)   | 0.0005          | 0.081                                | 1.394 |

## References:

1. USEPA. *Supplemental Guidance for Developing Soil Screening Levels for Superfund Sites*; Office of Solid Waste and Emergency Response, US Environmental Protection Agency., Washington,D.C., 2001. URL: <https://semspub.epa.gov/work/HQ/175878.pdf>
2. USEPA. Human Health Evaluation Manual. In *Risk Assessment Guidance for Superfund*; Office of emergency and remedial response, US Environmental Protection Agency, Washington,D.C., 1989; Volume 1, p. 179. URL: [https://www.epa.gov/sites/default/files/2015-09/documents/rags\\_a.pdf](https://www.epa.gov/sites/default/files/2015-09/documents/rags_a.pdf)
3. Van den Berg, R. *Human Exposure to Soil Contamination: A Qualitative and Quantitative Analysis towards Proposals for Human Toxicological Intervention Values.*; National Institute of Public Health and Environmental Protection (RIVM): Bilthoven, The Netherlands, 1995. URL: <https://www.rivm.nl/bibliotheek/rapporten/725201011.pdf>
4. Safiur Rahman, M.; Khan, M.D.H.; Jolly, Y.N.; Kabir, J.; Akter, S.; Salam, A. Assessing risk to human health for heavy metal contamination through street dust in the Southeast Asian Megacity: Dhaka, Bangladesh. *Science of The Total Environment* **2019**, *660*, 1610–1622, doi:<https://doi.org/10.1016/j.scitotenv.2018.12.425>.
5. Heidari, M.; Darijani, T.; Alipour, V. Heavy metal pollution of road dust in a city and its highly polluted suburb; quantitative source apportionment and source-specific ecological and health risk assessment. *Chemosphere* **2021**, *273*, 129656, doi:<https://doi.org/10.1016/j.chemosphere.2021.129656>.
